# Supplementary material for: A luminescent metal–organic framework for highly selective sensing of nitrobenzene and aniline
Source: Royal Society of Chemistry journal article supplement (doi:10.1039/c6ra19133a), 2016-01-01
Supplement: c6ra19133a1.pdf [file c6ra19133a1.pdf]

## *Electronic Supplementary Information (ESI)*

# **A Luminescent Metal-Organic Framework for Highly Selective Sensing of Nitrobenzene and Aniline**

Xin-Lei Huang, Lin Liu, Ming-Liang Gao and Zheng-Bo Han\*

*College of Chemistry, Liaoning University, Shenyang 110036 P.R. China E-mail: ceshzb@lnu.edu.cn*

### **Contents**

|                                                                                                                                                                                                                                                                                              |   |
|----------------------------------------------------------------------------------------------------------------------------------------------------------------------------------------------------------------------------------------------------------------------------------------------|---|
| <b>Materials and general methods</b> .....                                                                                                                                                                                                                                                   | 1 |
| <b>Synthesis of gea-MOF-1</b> .....                                                                                                                                                                                                                                                          | 2 |
| <b>Experimental details for the anti-interference ability of gea-MOF-1</b> .....                                                                                                                                                                                                             | 2 |
| <b>Table S1</b> Summary of the quenching efficiency of luminescent MOF sensors for NB.....                                                                                                                                                                                                   | 3 |
| <b>Fig. S1</b> PXRD patterns of <b>gea-MOF-1</b> .....                                                                                                                                                                                                                                       | 3 |
| <b>Fig. S2</b> <b>Excitation</b> (at 284 nm) and emission (at 385 nm) spectra of H <sub>3</sub> BTB in the solid state at room temperature.....                                                                                                                                              | 4 |
| <b>Fig. S3</b> Excitation (at 290 nm) and emission (at 373 nm) spectra of <b>gea-MOF-1</b> in the solid state at room temperature.....                                                                                                                                                       | 4 |
| <b>Fig. S4</b> Emission spectra of <b>gea-MOF-1</b> (5 mg) at room temperature in different solvents (5 mL) ( $\lambda_{\text{ex}} = 290$ nm).....                                                                                                                                           | 5 |
| <b>Fig.S5</b> The fluorescence intensity of <b>gea-MOF-1</b> in different concentration of nitroaromatic compounds (a) 2,4-dinitrophenol (DNP), (b) p-nitrophenol (PNP), (c) 4-nitrotoluene (4-NP), (d) o-nitrophenol (ONP) ( $\lambda_{\text{ex}} = 290$ nm) .....                          | 5 |
| <b>Fig.S6</b> Emission spectra of methanol suspension of <b>gea-MOF-1</b> upon addition of different nitroaromatic compounds (a) 2,4-dinitrophenol (DNP), (b) p-nitrophenol (PNP), (c) 4-nitrotoluene (4-NP), (d) o-nitrophenol (ONP) followed by NB ( $\lambda_{\text{ex}} = 290$ nm) ..... | 6 |
| <b>Fig. S7</b> Fluorescence intensity ratio histograms of <b>gea-MOF-1</b> dispersed in methanol with the addition of different aromatic compounds (pink) and subsequent addition of NB (blue) ( $\lambda_{\text{ex}} = 290$ nm) .....                                                       | 6 |
| <b>Fig. S8</b> Reproducibility of the quenching ability of <b>gea-MOF-1</b> dispersed in methanol to NB ( $\lambda_{\text{ex}} = 290$ nm).....                                                                                                                                               | 7 |
| <b>Fig. S9</b> Fluorescence intensity ratio histograms of <b>gea-MOF-1</b> dispersed in methanol with the addition of different organic amines (pink) and subsequent addition of AN (blue) ( $\lambda_{\text{ex}} = 290$ nm).....                                                            | 7 |
| <b>Fig. S10</b> Reproducibility of the quenching ability of <b>gea-MOF-1</b> dispersed in methanol to AN ( $\lambda_{\text{ex}} = 290$ nm).....                                                                                                                                              | 8 |
| <b>Fig. S11</b> The PXRD patterns of <b>gea-MOF-1</b> : the samples after 5 quenching cycles.....                                                                                                                                                                                            | 8 |
| <b>Fig. S12</b> The UV-vis absorption spectra of NB, DNP, PNP, 4-NP, ONP, AN in methanol.....                                                                                                                                                                                                | 8 |

### **Materials and general methods**

All solvents and starting materials for synthesis were purchased commercially and were used as received. Powder X-ray diffraction (PXRD) patterns were collected with a Bruker AXS D8 advanced automated diffractometer with Cu-K radiation. Luminescence spectra for the solid samples and liquid

samples were investigated with a HitachiF-4500 fluorescence spectrophotometer and Varian Cary Eclipse Fluorescence spectrophotometer, respectively. All UV/Vis spectra were measured on a SP-752(PC) UV-Vis spectrophotometer (Shanghai Spectrum Instrument Co., Ltd).

#### **Synthesis of gea-MOF-1**

The crystal of **gea-MOF-1** was synthesized according to references. A solution of  $Y(NO_3)_3 \cdot 6H_2O$  (8.6 mg, 0.0225mmol),  $H_3BTB$  (6.6 mg, 0.015 mmol), 2-fluorobenzoic acid (95.2 mg, 0.675 mmol), DMF (2 mL) and  $H_2O$  (0.5 mL) was prepared in a 20 ml scintillation vial and subsequently heated to 378 K for 36 hours in a preheated oven.

#### **Experimental details for the anti-interference ability of gea-MOF-1**

The powder sample of gea-MOF-1 (36 mg) was immersed in methanol (100 mL). Treated by ultrasonication and then aged to generate stable suspensions before the fluorescence study. Some aromatic compounds with the same concentrations of 60 ppm were added to the methanol suspension of gea-MOF-1, and the corresponding emission spectra were monitored. With the subsequent addition of 60 ppm nitrobenzene into the parallel tests, and the corresponding emission spectra were monitored.

**Table S1** Summary of the quenching efficiency of luminescent MOF sensors for NB<sup>a</sup>

| MOF                                                                                                                                                         | Quantity(mg)/solvent (mL) | NB concentration | Quenching efficiency | Ref.      |
|-------------------------------------------------------------------------------------------------------------------------------------------------------------|---------------------------|------------------|----------------------|-----------|
| [Tb(L <sub>1</sub> ) <sub>2.5</sub> (L <sub>2</sub> ) <sub>1.2</sub> (H <sub>2</sub> O) <sub>2</sub> ·2H <sub>2</sub> O]                                    | 3 mg/5 mL                 | 1000 ppm         | 60% <sup>a</sup>     | [1]       |
| {[(UO <sub>2</sub> ) <sub>2</sub> (H <sub>2</sub> TTHA)(H <sub>2</sub> O)]·4,4'-bipy·2H <sub>2</sub> O} <sub>n</sub>                                        | 2 mg/3 mL                 | 1000 ppm         | 90% <sup>b</sup>     | [2]       |
| Mg <sub>4</sub> (L)(DMF) <sub>4</sub> (H <sub>2</sub> O) <sub>4</sub> (DMF) <sub>0.5</sub>                                                                  | 5 mg/3 mL                 | 1500 ppm         | 100%                 | [3]       |
| [Eu(L) <sub>1.5</sub> (DEF)] <sub>n</sub>                                                                                                                   | 3 mg/5 mL                 | 970 ppm          | 100%                 | [4]       |
| [Cd <sub>3</sub> (NTB) <sub>2</sub> (DMA) <sub>3</sub> ]·2DMA                                                                                               | 5/3 mL                    | 600 ppm          | 79%                  | [5]       |
| [Zn <sub>3</sub> (trz) <sub>2</sub> (bpdca)]·DMA                                                                                                            | 3 mg/3 mL                 | 500 ppm          | 89%                  | [6]       |
| Tb <sup>3+</sup> @NENU-522                                                                                                                                  | 3 mg/3 mL                 | 2000 ppm         | 100%                 | [7]       |
| [Cd(ppvppa)(1,4-NDC)] <sub>n</sub>                                                                                                                          | 2 mg/2 mL                 | 800 ppm          | 94%                  | [8]       |
| Cd <sub>2.5</sub> Na(NTB) <sub>2</sub> (DMF) <sub>4</sub> ·3DMF                                                                                             | 0.3 mg/3 mL               | 500 ppm          | 83%                  | [9]       |
| [Zn <sub>3</sub> (HL) <sub>2</sub> (fma) <sub>2</sub> ]·DMA·H <sub>2</sub> O                                                                                | 0.3 mg/3 mL               | 300 ppm          | 92%                  | [10]      |
| [Tb(mtpc) <sub>1.5</sub> (DMA)(H <sub>2</sub> O)]·2H <sub>2</sub> O                                                                                         | 0.4 mg/5 mL               | 150ppm           | 87.9%                | [11]      |
| (DMA) <sub>2</sub> [Y <sub>9</sub> (μ <sub>3</sub> -OH) <sub>8</sub> (μ <sub>2</sub> -OH) <sub>3</sub> BTB <sub>6</sub> ] <sub>n</sub> ·(solv) <sub>x</sub> | 1.8 mg/5 mL               | 60 ppm           | 93.1%                | This work |

<sup>a</sup> The values were estimated from the literature<sup>[1]</sup>. <sup>b</sup> The values were estimated from the literature<sup>[2]</sup>.

<sup>c</sup> The quantity of MOF is missed in literature<sup>[5]</sup>.

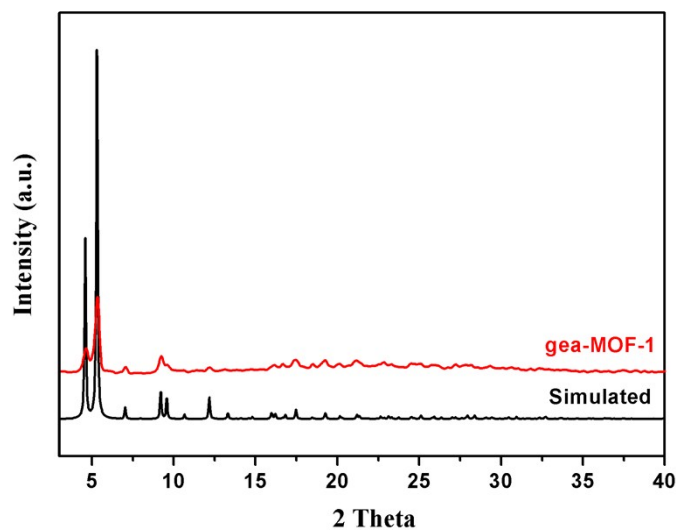**Fig. S1** PXRD patterns of **gea-MOF-1**

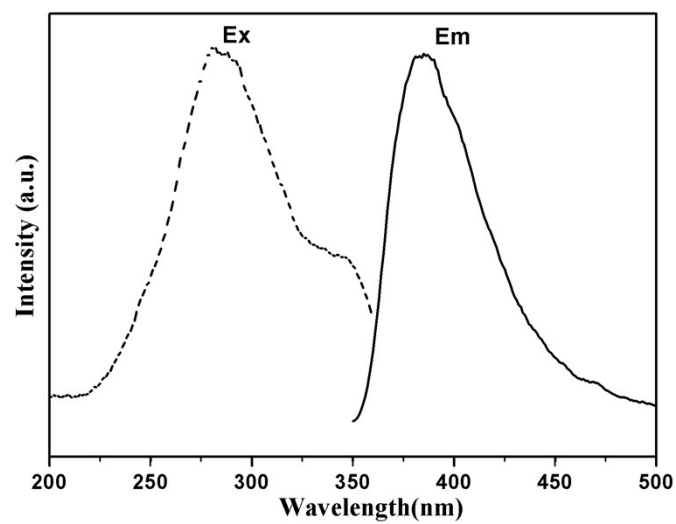

**Fig. S2** Excitation (at 284 nm) and emission (at 385 nm) spectra of H<sub>3</sub>BTB in the solid state at room temperature.

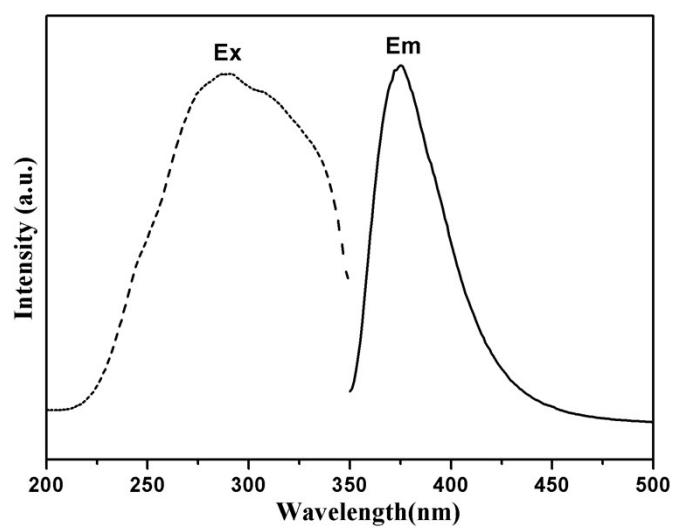

**Fig. S3** Excitation (at 290 nm) and emission (at 373 nm) spectra of **gea-MOF-1** in the solid state at room temperature.

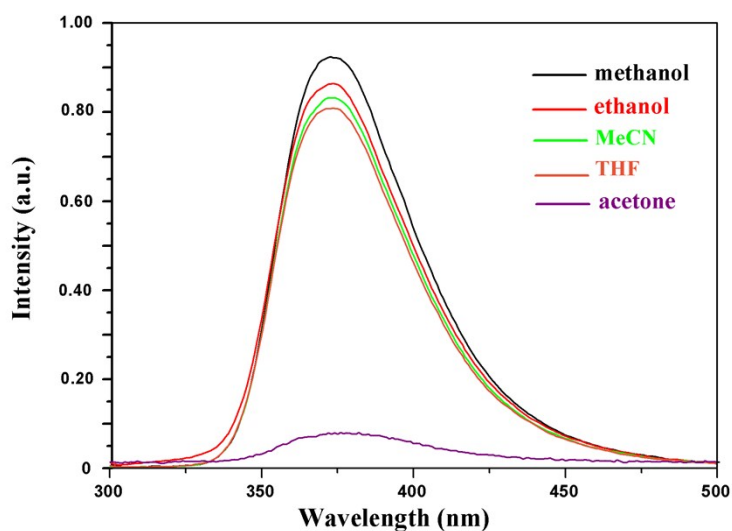

**Fig. S4** Emission spectra of **gea-MOF-1** (5 mg) at room temperature in different solvents (5 mL) ( $\lambda_{\text{ex}} = 290$  nm)

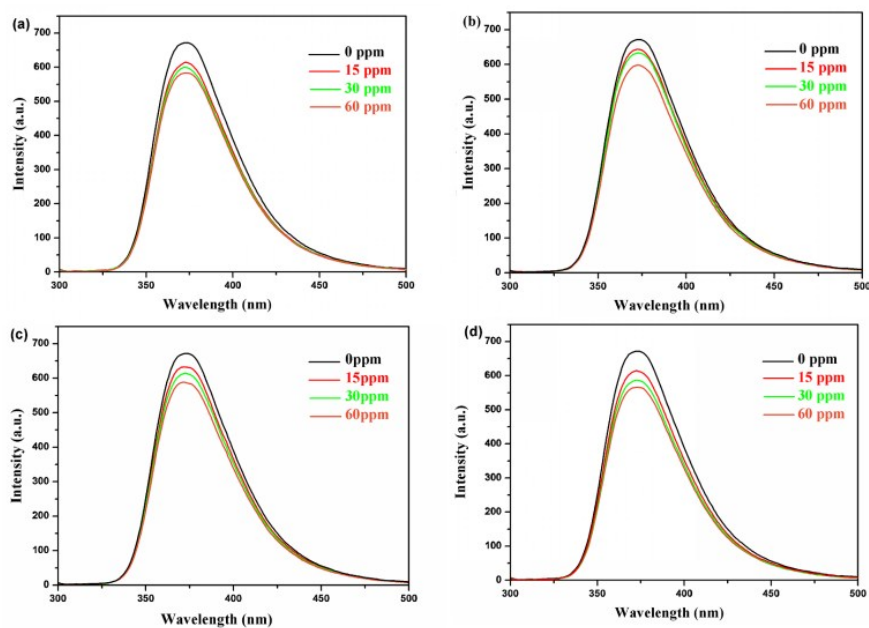

**Fig.S5** The luminescent intensity of **gea-MOF-1** in different concentration of nitroaromatic compounds (a) 2,4-dinitrophenol (DNP), (b) p-nitrophenol (PNP), (c) 4-nitrotoluene (4-NP), (d) o-nitrophenol (ONP) ( $\lambda_{\text{ex}} = 290$  nm)

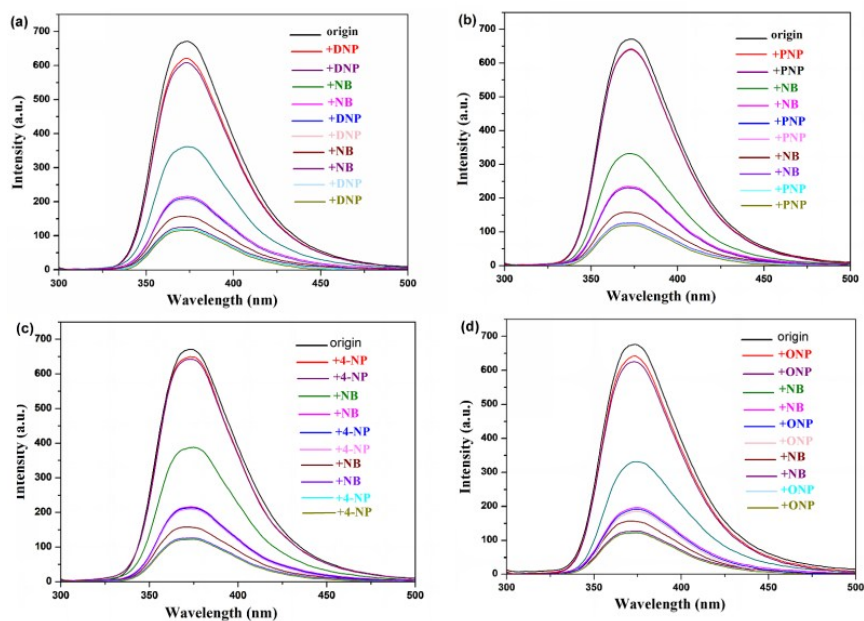

**Fig.S6** Emission spectra of methanol suspension of **gea-MOF-1** upon addition of different nitroaromatic compounds (a) 2,4-dinitrophenol (DNP), (b) p-nitrophenol (PNP), (c) 4-nitrotoluene (4-NP), (d) o-nitrophenol (ONP) followed by NB ( $\lambda_{ex}=290$  nm)

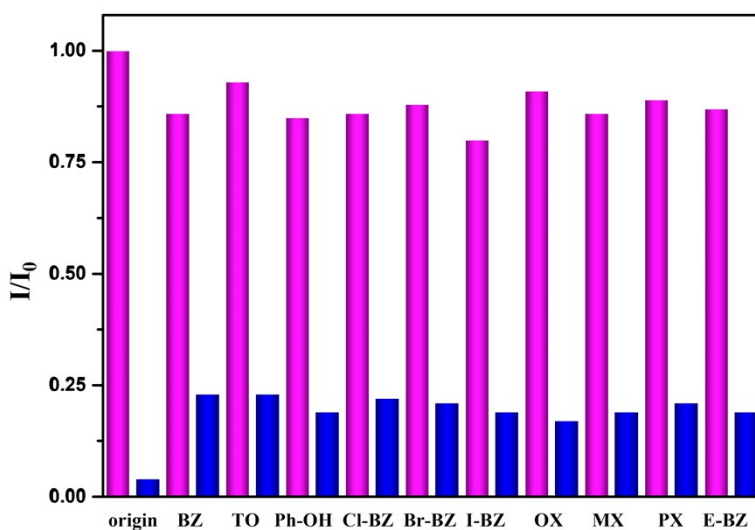

**Fig. S7** Fluorescence intensity ratio histograms of **gea-MOF-1** dispersed in methanol with the addition of different aromatic compounds (pink) and subsequent addition of NB (blue) ( $\lambda_{ex}=290$  nm)

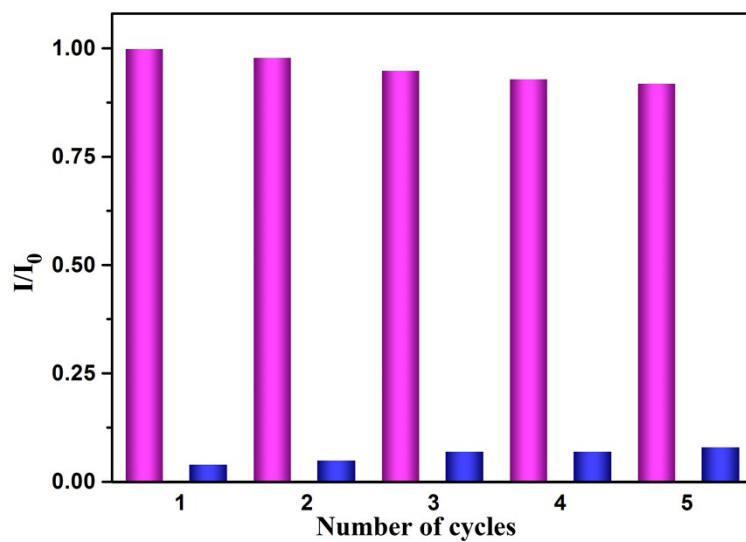

**Fig. S8** Reproducibility of the quenching ability of **gea-MOF-1** dispersed in methanol to NB ( $\lambda_{\text{ex}}=290$  nm).

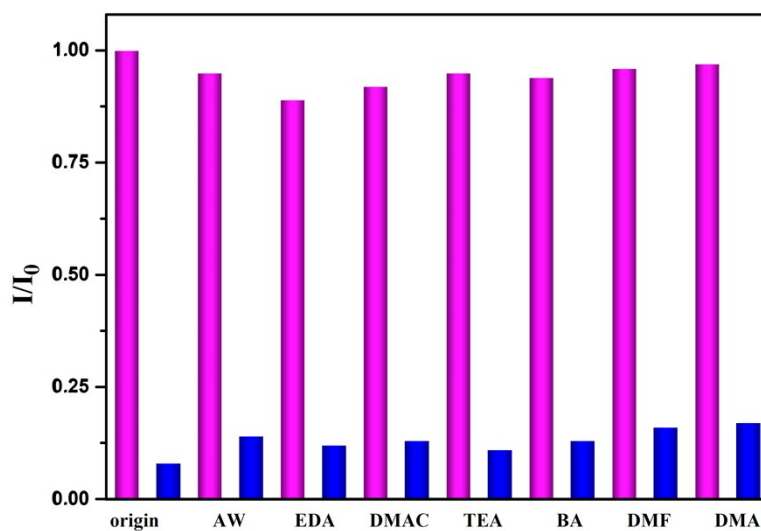

**Fig. S9** Fluorescence intensity ratio histograms of **gea-MOF-1** dispersed in methanol with the addition of different organic amines (pink) and subsequent addition of AN (blue) ( $\lambda_{\text{ex}}=290$  nm)

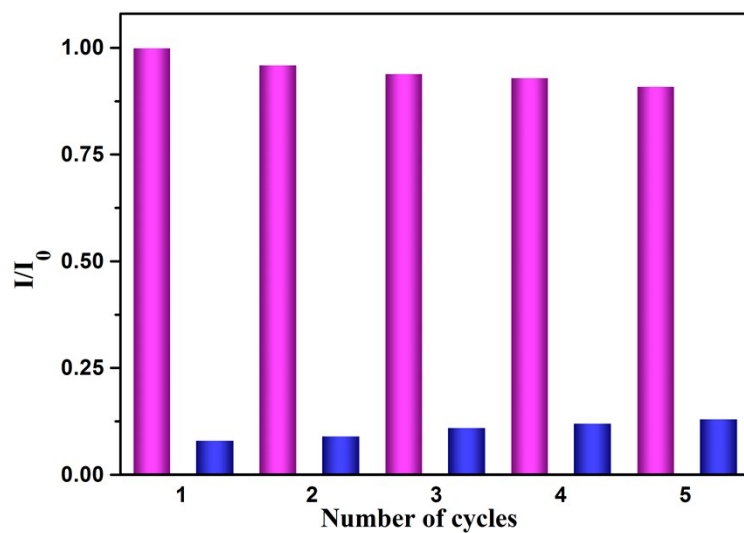

**Fig. S10** Reproducibility of the quenching ability of **gea-MOF-1** dispersed in methanol to AN ( $\lambda_{ex}$ = 290 nm)

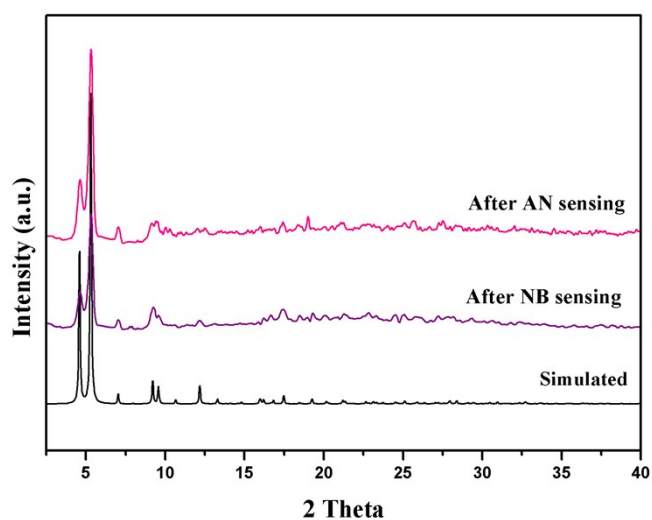

**Fig. S11** The PXRD patterns of **gea-MOF-1**: the samples after 5 quenching cycles

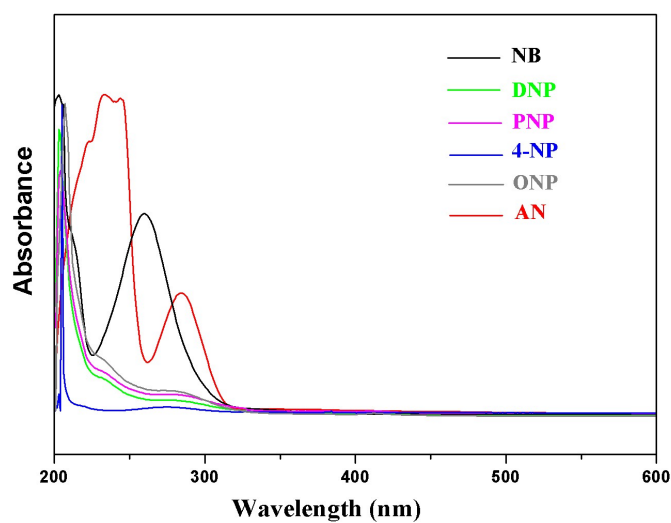

**Fig. S12** The UV-vis absorption spectra of NB, DNP, PNP, 4-NP, ONP, AN in methanol



**Reference:**

- [1] J. Z. Wang, W. Sun, S. Y. Chang, H. T. Liu, G. N. Zhang, Y. Q. Wang and Z. L. Liu, *RSC Adv.*, 2015, **5**, 48574-48579;
- [2] J. Song, X. Gao, Z. N. Wang, C. R. Li, Q. Xu, F. Y. Bai, Z. F. Shi and Y. H. Xing, *Inorg. Chem.*, 2015, **54**, 9046-9059;
- [3] S. L. Xie, H. F. Wang, Z. H. Liu, R. Dai and L. Z. Huang, *RSC Adv.*, 2015, **5**, 7160-7172;
- [4] S. N. Zhao, X. Z. Song, M. Zhu, X. Meng, L. L. Wu, S. Y. Song, C. Wang and H. J. Zhang, *RSC Adv.*, 2015, **5**, 93-98;
- [5] X. L. Hu, F. H. Liu, C. Qin, K. Z. Shao and Z. M. Su, *Dalton Trans.*, 2015, **44**, 7822-7827;
- [6] F. H. Liu, C. Qin, Y. Ding, H. Wu, K. Z. Shao and Z. M. Su, *Dalton Trans.*, 2015, **44**, 1754-1760;
- [7] W. Xie, S. R. Zhang, D. Y. Du, J. S. Qin, S. J. Bao, J. Li, Z. M. Su, W. W. He, Q. Fu and Y. Q. Lan, *Inorg. Chem.*, 2015, **54**, 3290-3296;
- [8] M. M. Chen, X. Zhou, H. X. Li, X. X. Yang and J. P. Lang, *Cryst. Growth Des.*, 2015, **15**, 2753-2760;
- [9] X. L. Hu, C. Qin, X. L. Wang, K. Z. Shao and Z. M. Su, *New J. Chem.*, 2015, **39**, 7858-7862;
- [10] X. L. Hu, C. Qin, L. Zhao, F. H. Liu, K. Z. Shao and Z. M. Su, *RSC Adv.*, 2015, **5**, 49606-49613;
- [11] X. M. Cao, N. Wei, L. Liu, L. Li and Z. B. Han, *RSC Adv.*, 2016, **6**, 19459-19462
